# Supplementary material for: Chronic cigarette smoking is linked with structural alterations in brain regions showing acute nicotinic drug-induced functional modulations
Source: PubMed Central journal article supplement (PMC4890474; doi:10.1186/s12993-016-0100-5), 2016-06-02
Supplement: 12993_2016_100_MOESM1_ESM.pdf [file 12993_2016_100_MOESM1_ESM.pdf]

## SUPPLEMENTAL INFORMATION

### **Chronic cigarette smoking is linked with structural alterations in brain regions showing acute nicotinic agonist-induced functional modulations**

Matthew T. Sutherland, Michael C. Riedel, Jessica Flannery, Julio A. Yanes, Peter T. Fox, Elliot A. Stein, and Angela R. Laird

## SUPPLEMENTAL CONTENT

### SUPPLEMENTAL TABLES

- [Table S1](#): Participant characteristics for included studies.
- [Table S2](#): Additional methodological details for included studies.
- [Table S3](#): MACM seed regions: Numbers of experiments, foci, and subjects.
- [Table S4](#): MACM co-activation coordinates for structurally-impacted seed regions.

### SUPPLEMENTAL FIGURES

- [Figure S1](#): Diagram of study selection.
- [Figure S2](#): Overlapping and non-overlapping clusters from structural and functional (decreases) meta-analyses.
- [Figure S3](#): Overlapping and non-overlapping clusters from structural and functional (increases) meta-analyses.
- [Figure S4](#): Conjoint structural and functional effects *when considering only functional studies involving nicotine administration.*
- [Figure S5](#): Conjoint structural and functional effects *when considering only functional studies involving cigarette smokers.*
- [Figure S6](#): Delineating functionally interrelated ROIs.

### SUPPLEMENTAL REFERENCES

**Table S1.** Participant characteristics for included studies reporting gray matter alterations among cigarette smokers versus nonsmokers.

| Study                               | N Foci                |                       | Sample Size<br>(N females) |                          | Age<br>(Range)                     |                                    | Smoker Characterization Details |                       |                  |                            |                       |                          |
|-------------------------------------|-----------------------|-----------------------|----------------------------|--------------------------|------------------------------------|------------------------------------|---------------------------------|-----------------------|------------------|----------------------------|-----------------------|--------------------------|
|                                     | Nonsmoker<br>> Smoker | Smoker ><br>Nonsmoker | Nonsmoker                  | Smoker                   | Nonsmoker                          | Smoker                             | Criteria                        | Pack<br>Years         | FTND             | Years<br>Smoking           | Cigs/<br>Day          | Time Since<br>Last Cig   |
| Stoeckel et al. (2015)              | 1                     | 0                     | 16<br>(5f)                 | 16<br>(4f)               | 34.2 ± 7.2<br>(18-55)              | 37.9 ± 11.6<br>(18-55)             | >10 cigs/day (6<br>month)       | 16.1 ± 12.2           | 4.4 ± 2.2        | 17.6 ± 10.5                | 16.8 ± 4.9            | 1 hr                     |
| Hanlon et al. (2014)                | 6                     | 2                     | 60<br>(27f)                | 58<br>(25f)              | 30 <sup>a</sup><br>(20-49)         | 32 <sup>a</sup><br>(20-49)         | ND                              | 12 <sup>a</sup>       | 4.6 <sup>a</sup> | NR                         | 16 <sup>a</sup>       | 1 hr                     |
| Franklin et al. (2014)              | 4                     | 3                     | 80<br>(39f)                | 80<br>(39f)              | 32 <sup>a</sup>                    | 33.9 <sup>a</sup>                  | ND                              | 10.5 <sup>a</sup>     | 4.5 <sup>a</sup> | 14 <sup>a</sup>            | 15 <sup>a</sup>       | NR                       |
| Wang et al. (2014)                  | 3                     | 2                     | 20<br>(0f)                 | 22<br>(0f)               | 21.8 ± 1.3<br>(19-28)              | 22.5 ± 2.5<br>(19-28)              | >8 cigs/day<br>(1y), ND         | 3.1 ± 2.6             | NR               | 5.0 ± 2.3                  | 11.9 ± 6.1            | 12 hr                    |
| Fritz et al. (2014)                 | 16                    | 0                     | 659<br>(416f)              | 315<br>(167f)            | 51.5 ± 14.5                        | 44.1 ± 11.8                        | self-reported<br>regular smoker | 17.8 ± 12.3           | NR               | 26                         | 13.2 ± 7.0            | NR                       |
| Morales et al. (2012)               | 1                     | 0                     | 18<br>(8f)                 | 25<br>(12f)              | 30.1 ± 2.2<br>(18-55)              | 35.4 ± 1.8<br>(18-55)              | smoked 25 of<br>last 30 days    | 11.5 ± 21.9           | 3.8 ± 0.4        | 19                         | 14.1 ± 1.2            | NR                       |
| Zhang et al. (2011)                 | 1                     | 1                     | 24 <sup>b</sup><br>(12f)   | 24 <sup>b</sup><br>(12f) | 36.6 ± 6.5                         | 36.8 ± 8.0                         | NR                              | 18.6 ± 7.1            | 5.6 ± 1.9        | 18.4 ± 5.8                 | 21.4 ± 8.2            | 2 hr                     |
| Yu et al. (2011)                    | 2                     | 0                     | 16<br>(0f)                 | 16<br>(0f)               | 39.2 ± 4.5                         | 41.6 ± 5.5                         | >15 cigs/day<br>(15y), ND       | 21.7                  | 7.2 ± 1.4        | 21.1 ± 3.9                 | 20.6 ± 7.4            | NR                       |
| Almeida et al. (2011)               | 3                     | 0                     | 36<br>(NR)                 | 48<br>(NR)               | 77.3 ± 3.5                         | 74.9 ± 4.0                         | >5 cigs/day<br>(1y)             | NR                    | NR               | 55.7 ± 7.4                 | 19.0 ± 10.3           | NR                       |
| Kuhn et al. (2010) <sup>c</sup>     | 1                     | 0                     | 21<br>(11f)                | 22<br>(14f)              | 30.9 ± 8.2                         | 31.3 ± 7.8                         | NR                              | 12.1 ± 13.2           | 2.8 ± 1.8        | 13.7 ± 8.1                 | 13.4 ± 8.8            | NR                       |
| Liao et al. (2010)                  | 3                     | 0                     | 44<br>(10f)                | 44<br>(8f)               | 26.3 ± 5.8<br>(19-39)              | 28.1 ± 5.5<br>(19-39)              | >10 cigs/day<br>(1y), ND        | NR                    | NR               | 10.4 ± 5.7                 | 20.3 ± 7.7            | NR                       |
| Almeida et al. (2008)               | 5                     | 0                     | 39<br>(14f)                | 39<br>(14f)              | 75.7 ± 3.2<br>(70-83)              | 75.0 ± 3.4<br>(70-83)              | >5 cigs/day<br>(1y)             | NR                    | 4                | 59 <sup>d</sup><br>(40-72) | 16                    | NR                       |
| Chen et al. (2006)                  | 0                     | 2                     | 109<br>(109f)              | 11<br>(11f)              | 62.5 ± 1.4 <sup>e</sup><br>(60-64) | 62.5 ± 1.4 <sup>e</sup><br>(60-64) | self-reported<br>daily smoking  | NR                    | NR               | NR                         | NR                    | NR                       |
| Gallinat et al. (2006) <sup>f</sup> | 23                    | 0                     | 23<br>(11f)                | 22<br>(10f)              | 30.3 ± 7.9                         | 30.8 ± 7.5                         | ND                              | 13.5 ± 13.0           | 2.9 ± 1.7        | 13.9 ± 7.3                 | 14.5 ± 9.2            | NR                       |
| Brody et al. (2004)                 | 9                     | 0                     | 17<br>(7f)                 | 19<br>(8f)               | 37.9 ± 12.9<br>(21-65)             | 39.5 ± 10.3<br>(21-65)             | >20 cigs/day,<br>ND             | 31.0 ± 17.9<br>(9-70) | 5.1 ± 1.9        | NR                         | 26.2 ± 7.4<br>(20-40) | no smoking<br>morning of |
| Overall                             | 78                    | 10 <sup>g</sup>       | 1182                       | 761                      | 41.1                               | 41.8                               | --                              | 15.3                  | 4.5              | 22.9                       | 17                    | --                       |

**Note.** Mean±SD reported unless otherwise indicated. N, number; cig, cigarette; FTND, Fagerström Test for Nicotine Dependence; y, year(s); f, females; hr, hour(s); ND, nicotine dependent; NR, not reported. <sup>a</sup> Smoker group characteristics calculated from smoker subgroup data reported in the original study. <sup>b</sup> Gray matter decreases observed in a subset of smokers (high-pack years); participant characteristics reflect this smoker subset. <sup>c</sup> Study assessed cortical thickness. <sup>d</sup> Median reported (as opposed to mean). <sup>e</sup> Participant characteristics are from a larger pool of participants of which only a subset were scanned. <sup>f</sup> Unmodulated data included in this meta-analysis (i.e., Table 3 from original study). <sup>g</sup> Whereas 14 studies (78 foci) reported gray matter decreases among smokers, 5 studies (10 foci) reported gray matter increases. Given the limited number of foci, gray matter increases were not considered further.

**Table S2.** Additional methodological details for included studies.

| Study                  | Additional Details    |                             |                       |           |                             |            |
|------------------------|-----------------------|-----------------------------|-----------------------|-----------|-----------------------------|------------|
|                        | Other Drug Use Screen | Scanner                     | Thickness, Slice (mm) | FWHM (mm) | Threshold                   | Software   |
| Stoeckel et al. (2015) | interview             | 3T Siemens (TRIO)           | 1.3                   | 8         | $p < 0.05^a$                | SPM8       |
| Hanlon et al. (2014)   | urine                 | 3T Siemens (TRIO)           | 1                     | 8         | $p < 0.01^a$                | SPM8       |
| Franklin et al. (2014) | urine                 | 3T Siemens (TRIO)           | 1                     | 8         | $p < 0.025^a$               | SPM8       |
| Wang et al. (2014)     | interview             | 3T Siemens                  | 1                     | 10        | $p < 0.05^a$                | SPM8       |
| Fritz et al. (2014)    | interview             | 1.5T Siemens (Avanto)       | 1                     | 12        | $p < 0.05^a$                | SPM8       |
| Morales et al. (2012)  | urine, interview      | 1.5T Siemens (Sonata)       | 1                     | 8         | $p < 0.05^a$                | SPM8       |
| Zhang et al. (2011)    | urine, interview      | 3T Siemens (Allegra)        | 1                     | 8         | $p < 0.05^a$                | FSL        |
| Yu et al. (2011)       | urine                 | 3T Siemens (TRIO)           | 1                     | 8         | $p < 0.05^a$                | SPM5       |
| Almeida et al. (2011)  | NR                    | 1.5T Siemens (Symphony)     | 0.9                   | NR        | $p < 0.005$<br>(100 voxels) | SPM5       |
| Kuhn et al. (2010)     | NR                    | 3T Brucker (Medspec 30/100) | 1.5                   | 10        | $p < 0.05^a$                | Freesurfer |
| Liao et al. (2010)     | urine, interview      | 3T Siemens (Allegra)        | 1                     | 12        | $p < 0.001$<br>(100 voxels) | SPM5       |
| Almeida et al. (2008)  | NR                    | 1.5T Siemens (Symphony)     | 0.9                   | 8         | $p < 0.005$<br>(50 voxels)  | SPM2       |
| Chen et al. (2006)     | NR                    | 1.5T Philips (Gyrosan)      | 2                     | 12        | $p < 0.05^a$                | SPM2       |
| Gallinat et al. (2006) | interview             | 3T Brucker (Medspec 30/100) | 1.5                   | 12        | $p < 0.05^a$                | SPM2       |
| Brody et al. (2004)    | urine, interview      | 1.5T Siemens (Vision)       | 1.5                   | 12        | $p < 0.001$<br>(50 voxels)  | SPM99      |

**Note.** Studies were identified via *Web of Science* (<http://webofknowledge.com>) and *PubMed* (<http://www.pubmed.gov>) database searches for peer-reviewed articles published through May 2015 with the following logical conjunction of terms: (“voxel-based morphometry” OR “morphometry” OR “gray matter density” OR “gray matter volume”) AND (“nicotine” OR “tobacco” OR “cigarette” OR “smok\*”). NR, not reported; T, Tesla; mm, millimeters; FWHM, full width at half maximum of spatial smoothing kernel; SPM, Statistical Parametric Mapping; FSL, FMRIB Software Library. <sup>a</sup> Cluster-corrected for multiple comparisons.

**Table S3.** Numbers of experiments, foci, and subjects utilized in the MACM assessments of each structurally-impacted ROI.

| Seed ROI | Region                                |   | <i>N</i> Experiments | <i>N</i> Foci | <i>N</i> Subjects |
|----------|---------------------------------------|---|----------------------|---------------|-------------------|
| 1        | thalamus (lateral posterior nucleus)  | R | 132                  | 2626          | 1788              |
| 2        | dmPFC (BA 6) (superior frontal gyrus) | R | 45                   | 709           | 687               |
| 3        | vmPFC (BA10) (superior frontal gyrus) | L | 37                   | 445           | 493               |
| 4        | vIPFC (BA 10) (middle frontal gyrus)  | R | 111                  | 1662          | 1672              |
| 5        | dmPFC (BA 8) (medial frontal gyrus)   | R | 48                   | 611           | 670               |
| 6        | parahippocampal gyrus                 | L | 94                   | 1611          | 1478              |
| 7        | mPFC (BA10) (medial frontal gyrus)    | R | 43                   | 596           | 584               |
| 8        | medial OFC (BA 11)                    | B | 14*                  | 121           | 263               |
| 9        | mPFC (BA10) (medial frontal gyrus)    | L | 41                   | 736           | 600               |
| 10       | cerebellum (dentate)                  | R | 151                  | 2451          | 1934              |
| 11       | insula (BA 13)                        | L | 229                  | 3761          | 3103              |
| 12       | thalamus (medial dorsal nucleus)      | B | 207                  | 3564          | 3018              |

Note. We searched the BrainMap database using the *Sleuth* software application (<http://www.brainmap.org/sleuth/>) to identify all experiments that reported one or more activation coordinates in each of the 12 structurally-impacted seed regions. To achieve sufficient power for subsequent analyses, ROIs with less than 30 experiments were eliminated from further analysis as practiced in previously published MACM assessments (e.g., Riedel et al., 2015). Accordingly, one ROI (\*; mOFC, ROI 8) was omitted from subsequent assessments. Given that this brain region is susceptible to BOLD fMRI signal loss due to magnetic field inhomogeneities (Weiskopf et al., 2007), a low number of activation coordinates archived in the database was not surprising. *N*, number. Numbering corresponds to ROIs shown in main text Figure 1 and Table 1

**Table S4.** Meta-analytic connectivity modeling (MACM) coordinates of task-related co-activation for each structurally-impacted ROI.

| Seed ROI                        | Coactivation Cluster                |                               | Volume | x     | y   | z   |
|---------------------------------|-------------------------------------|-------------------------------|--------|-------|-----|-----|
| 1                               | Thalamus, Lateral Posterior Nucleus | R                             | 14480  | 14    | -20 | 12  |
|                                 | Cerebellum, Culmen                  | L                             | 11600  | -24   | -54 | -22 |
|                                 | Cerebellum, Culmen of Vermis        | L                             | 1024   | -4    | -62 | -6  |
| 2                               | Superior Frontal (BA6)              | R                             | 24176  | 16    | 24  | 52  |
|                                 | Cingulate Gyrus (BA31)              | L                             | 4192   | -8    | -54 | 28  |
|                                 | Medial Frontal Gyrus (BA10)         | L                             | 1840   | -6    | 52  | 12  |
|                                 | Superior Temporal Gyrus (BA39)      | R                             | 1608   | -50   | -58 | 26  |
|                                 | Superior Frontal Gyrus (BA8)        | L                             | 1472   | -10   | 44  | 40  |
|                                 | Superior Temporal Gyrus (BA39)      | R                             | 1400   | 54    | -56 | 22  |
|                                 | Inferior Frontal Gyrus (BA47)       | R                             | 1128   | 38    | 28  | -10 |
|                                 | Middle Temporal Gyrus (BA21)        | L                             | 1096   | -44   | 4   | -24 |
|                                 | Medial Frontal Gyrus (BA10)         | R                             | 1000   | 10    | 50  | 6   |
|                                 | Precuneus (BA19)                    | R                             | 960    | 40    | -74 | 36  |
|                                 | Middle Temporal Gyrus (BA21)        | R                             | 848    | 54    | -10 | -12 |
|                                 | 3                                   | Superior Frontal Gyrus (BA10) | L      | 13432 | -6  | 54  |
| Posterior Cingulate (BA23)      |                                     | L                             | 4472   | -8    | -56 | 18  |
| Inferior Frontal Gyrus (BA47)   |                                     | L                             | 4328   | -44   | 22  | -4  |
| Uncus, Amygdala                 |                                     | L                             | 3256   | -24   | -8  | -24 |
| Parahippocampal Gyrus, Amygdala |                                     | R                             | 1560   | 28    | -4  | -18 |
| Lateral Geniculum Body          |                                     | R                             | 1408   | 22    | -26 | -4  |
| Inferior Frontal Gyrus (BA47)   |                                     | R                             | 1144   | 36    | 28  | -8  |
| Cingulate Gyrus (BA24)          |                                     | L                             | 904    | 0     | -6  | 44  |
| Precentral Gyrus (BA43)         |                                     | R                             | 856    | 58    | -4  | 10  |
| Superior Frontal Gyrus (BA9)    |                                     | L                             | 744    | -8    | 48  | 32  |
| 4                               | Middle Frontal Gyrus (BA10)         | R                             | 45072  | 32    | 48  | 4   |
|                                 | Insula (BA13)                       | L                             | 22328  | -34   | 18  | 6   |
|                                 | Medial Frontal Gyrus (BA6)          | L                             | 18192  | 0     | 16  | 44  |
|                                 | Inferior Parietal Lobule (BA40)     | R                             | 10072  | 42    | -46 | 48  |
|                                 | Frontal Lobe, Sub-Gyral             | L                             | 9448   | -34   | 48  | 2   |
|                                 | Superior Parietal Lobule (BA7)      | L                             | 7368   | -26   | -64 | 40  |
|                                 | Putamen, Lentiform Nucleus          | L                             | 3272   | -24   | -2  | 6   |
|                                 | Thalamus, Medial Dorsal Nucleus     | R                             | 1448   | 6     | -22 | 6   |
|                                 | Cerebellum, Posterior Lobe, Declive | L                             | 1256   | -32   | -58 | -18 |
|                                 | Middle Frontal Gyrus (BA6)          | L                             | 936    | -26   | -6  | 54  |

Note. Table continued on next page.

**Table S4 (continued).**

| Seed ROI               | Coactivation Cluster                 |     | Volume | x   | y   | z   |
|------------------------|--------------------------------------|-----|--------|-----|-----|-----|
| 5                      | Medial Frontal Gyrus (BA8)           | R   | 15872  | 10  | 42  | 36  |
|                        | Middle Frontal Gyrus (BA9)           | R   | 4000   | 44  | 8   | 36  |
|                        | Supramarginal Gyrus (BA40)           | L   | 3440   | -52 | -54 | 32  |
|                        | Sub-lobar. Extra-Nuclear (BA47)      | L   | 2496   | -34 | 20  | -2  |
|                        | Superior Temporal Gyrus (BA13)       | R   | 2440   | 40  | -48 | 22  |
|                        | Precuneus (BA7)                      | R   | 2112   | 6   | -58 | 38  |
|                        | Putamen, Lentiform Nucleus           | L   | 1536   | -20 | 4   | 12  |
|                        | Inferior Frontal Gyrus (BA45)        | R   | 1016   | 48  | 22  | 14  |
|                        | Sub-lobar, Claustrum                 | R   | 872    | 36  | 6   | -6  |
| 6                      | Parahippocampal Gyrus (BA27)         | L   | 56072  | -20 | -30 | -2  |
|                        | Cerebellum, Posterior Lobe, Declive  | R   | 15904  | 34  | -54 | -16 |
|                        | Medial Frontal Gyrus (BA6)           | L   | 10416  | -42 | 4   | 30  |
|                        | Medial Frontal Gyrus (BA6)           | L   | 7872   | -6  | 4   | 48  |
|                        | Inferior Frontal Gyrus (BA9)         | R   | 5368   | 44  | 4   | 32  |
|                        | Precuneus (BA7)                      | L   | 4816   | -20 | -72 | 42  |
|                        | Insula (BA47)                        | R   | 3832   | 32  | 24  | 2   |
|                        | Superior Parietal Lobule (BA7)       | R   | 2592   | 26  | -60 | 46  |
| 7                      | Medial Frontal Gyrus (BA10)          | R   | 13600  | 12  | 56  | 6   |
|                        | Putamen, Lentiform Nucleus           | R   | 5296   | 26  | 6   | 2   |
|                        | Cerebellum, Posterior Lobe, Declive  | R   | 1888   | 38  | -68 | -18 |
|                        | Cerebellum, Anterior Lobe, Nodule    | R   | 1840   | 0   | -58 | -28 |
|                        | Inferior Frontal Gyrus (BA47)        | L   | 1664   | -46 | 14  | 0   |
|                        | Cingulate Gyrus (BA32)               | R   | 1288   | 2   | 26  | 36  |
|                        | Occipital Lobe. Lingual Gyrus (BA18) | L   | 960    | -2  | -96 | -4  |
|                        | Cerebellum, Posterior Lobe, Pyramis  | L   | 896    | -12 | -72 | -30 |
|                        | Thalamus                             | R   | 896    | 14  | -28 | -2  |
|                        | Superior Temporal Gyrus (BA22)       | R   | 888    | 42  | -24 | -8  |
|                        | Cerebellum, Posterior Lobe,          | L   | 800    | -42 | -56 | -40 |
|                        | Thalamus, Medial Dorsal Nucleus      | R   | 792    | 4   | -14 | 12  |
|                        | Cerebellum, Anterior Lobe, Culmen    | L   | 768    | -46 | -48 | -30 |
| Cingulate Gyrus (BA32) | R                                    | 632 | 2      | 12  | 40  |     |
| 9                      | Medial Frontal Gyrus (BA10)          | L   | 15704  | -12 | 56  | 6   |
|                        | Middle Temporal Gyrus (BA39)         | L   | 3592   | -46 | -60 | 24  |
|                        | Middle Frontal Gyrus (BA9)           | L   | 2312   | -46 | 8   | 38  |
|                        | Cingulate Gyrus (BA32)               | L   | 2224   | -8  | 24  | 36  |
|                        | Middle Temporal Gyrus (BA21)         | L   | 1152   | -56 | -40 | -4  |
|                        | Precuneus (BA31)                     | L   | 952    | -10 | -58 | 20  |
|                        | Inferior Frontal Gyrus (BA47)        | L   | 912    | -38 | 30  | -8  |
|                        | Thalamus, Medial Dorsal Nucleus      | L   | 688    | -6  | -20 | 12  |

Note. Table continued on next page.

**Table S4 (continued).**

| Seed ROI | Coactivation Cluster                |   | Volume | x   | y   | z   |
|----------|-------------------------------------|---|--------|-----|-----|-----|
| 10       | Thalamus                            | L | 123088 | -14 | -20 | 4   |
|          | Cerebellum, Anterior Lobe, Dentate  | R | 33808  | 16  | -56 | -20 |
|          | Medial Frontal Gyrus (BA6)          | L | 18520  | -4  | -8  | 56  |
| 11       | Insula (BA13)                       | L | 148280 | -40 | 10  | 10  |
|          | Superior Frontal Gyrus (BA6)        | L | 25152  | -4  | 6   | 50  |
|          | Inferior Parietal Lobule (BA40)     | R | 20680  | 38  | -48 | 42  |
|          | Cerebellum, Anterior Lobe, Culmen   | R | 8176   | 22  | -56 | -22 |
|          | Cerebellum, Anterior Lobe, Culmen   | L | 7560   | -22 | -56 | -24 |
| 12       | Thalamus, Medial Dorsal Nucleus     | R | 122696 | 4   | -18 | 6   |
|          | Medial Frontal Gyrus (BA6)          | L | 24384  | -2  | 2   | 52  |
|          | Inferior Parietal Lobule (BA40)     | L | 8288   | -34 | -52 | 42  |
|          | Cerebellum, Posterior Lobe, Declive | R | 7560   | 28  | -56 | -18 |
|          | Insula (BA13)                       | R | 5736   | 46  | -24 | 16  |
|          | Superior Parietal Lobule (BA7)      | R | 5712   | 28  | -60 | 44  |
|          | Fusiform Gyrus, (BA37)              | L | 5368   | -42 | -56 | -18 |

Note. Center of mass coordinates for co-activation clusters are reported. Given that many of the clusters' volumes were relatively large, the table does not adequately capture all regions of co-activation (for visualization of co-activation results, see main text Figure 3). One region (mOFC, ROI 8) failed to return a sufficient number of experiments from the database and was omitted from the table. Numbering corresponds to ROIs shown in main text Figure 1 and Table 1. Coordinates (x, y, z) are reported in Talairach space. Volume is mm<sup>3</sup>. B, bilateral; R, right; L, left; BA, Brodmann area.

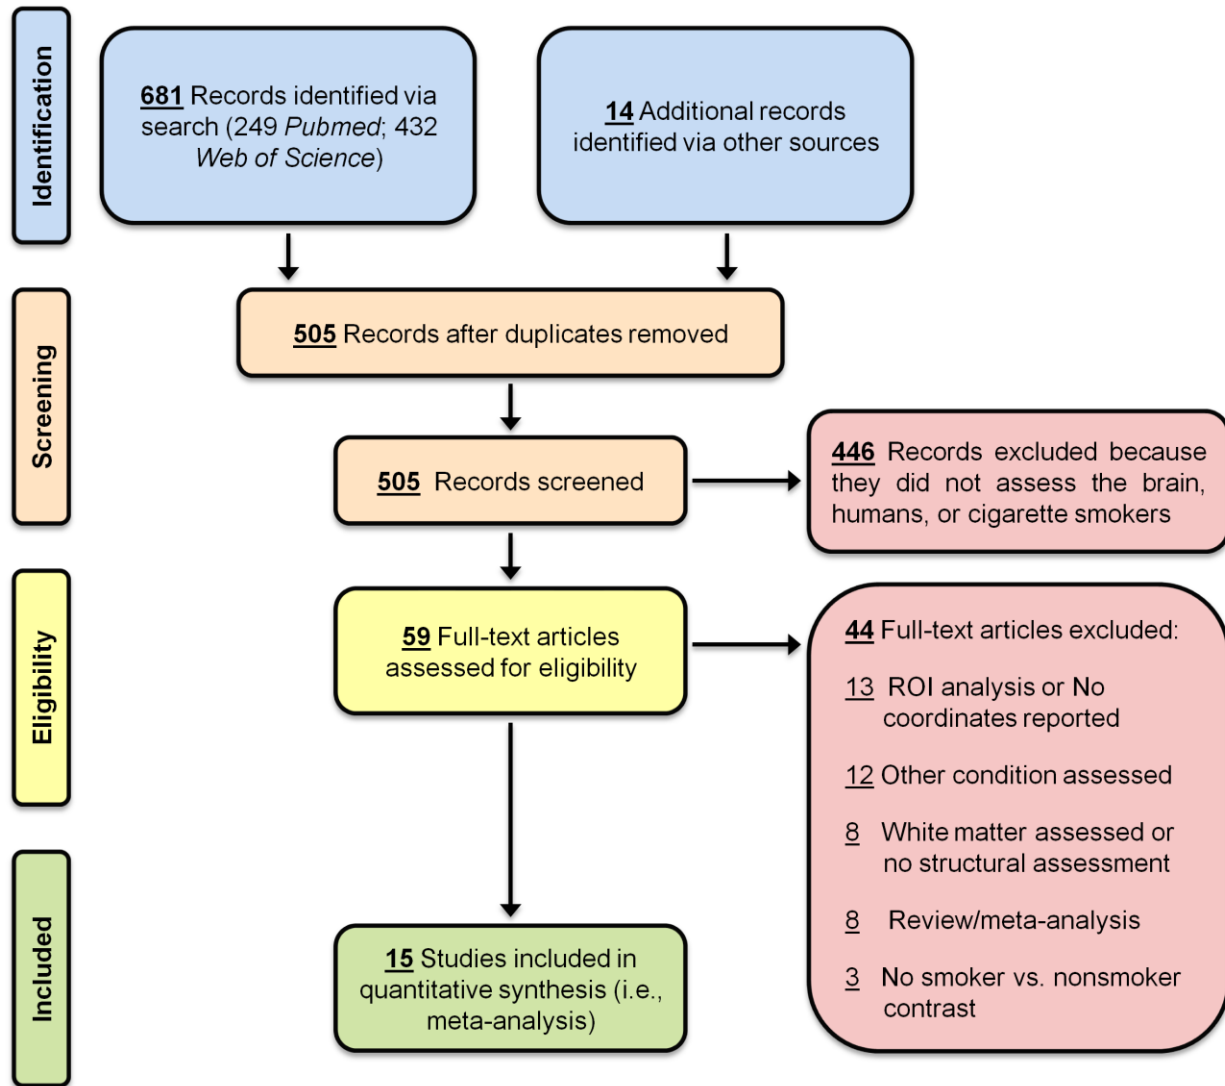

**Figure S1. Diagram of study selection process (structural meta-analysis).** We first searched the *PubMed* (<http://www.pubmed.gov>) and *Web of Science* (<http://webofknowledge.com>) databases for peer-reviewed articles with the following logical conjunction of terms: (“voxel-based morphometry” OR “morphometry” OR “gray matter density” OR “gray matter volume”) AND (“nicotine” OR “tobacco” OR “cigarette” OR “smok\*”). We identified additional candidate publications through *other sources* by consulting the bibliographies of recent review articles, and also tracking the references of and citations to relevant papers. This literature search was conducted on papers published (or e-ahead published) through August 2015. After removing duplicates, records were screened to remove those that were not relevant to the current research question (i.e., we removed studies that did not investigate the brain, used animal models, or did not consider cigarette smokers). Of the 59 full-text articles reviewed for eligibility, 44 were excluded because the study: involved an ROI analysis or did not report coordinates of grey matter alterations, assessed other conditions in addition to cigarette smoking (e.g., schizophrenia, mental illness, poly-substance abuse, alcohol dependence), assessed white matter or brain function, was a review article or meta-analysis, or did not involve a smoker versus non-smoker contrast (e.g., within-subjects design among smokers, nicotine prenatal exposure).



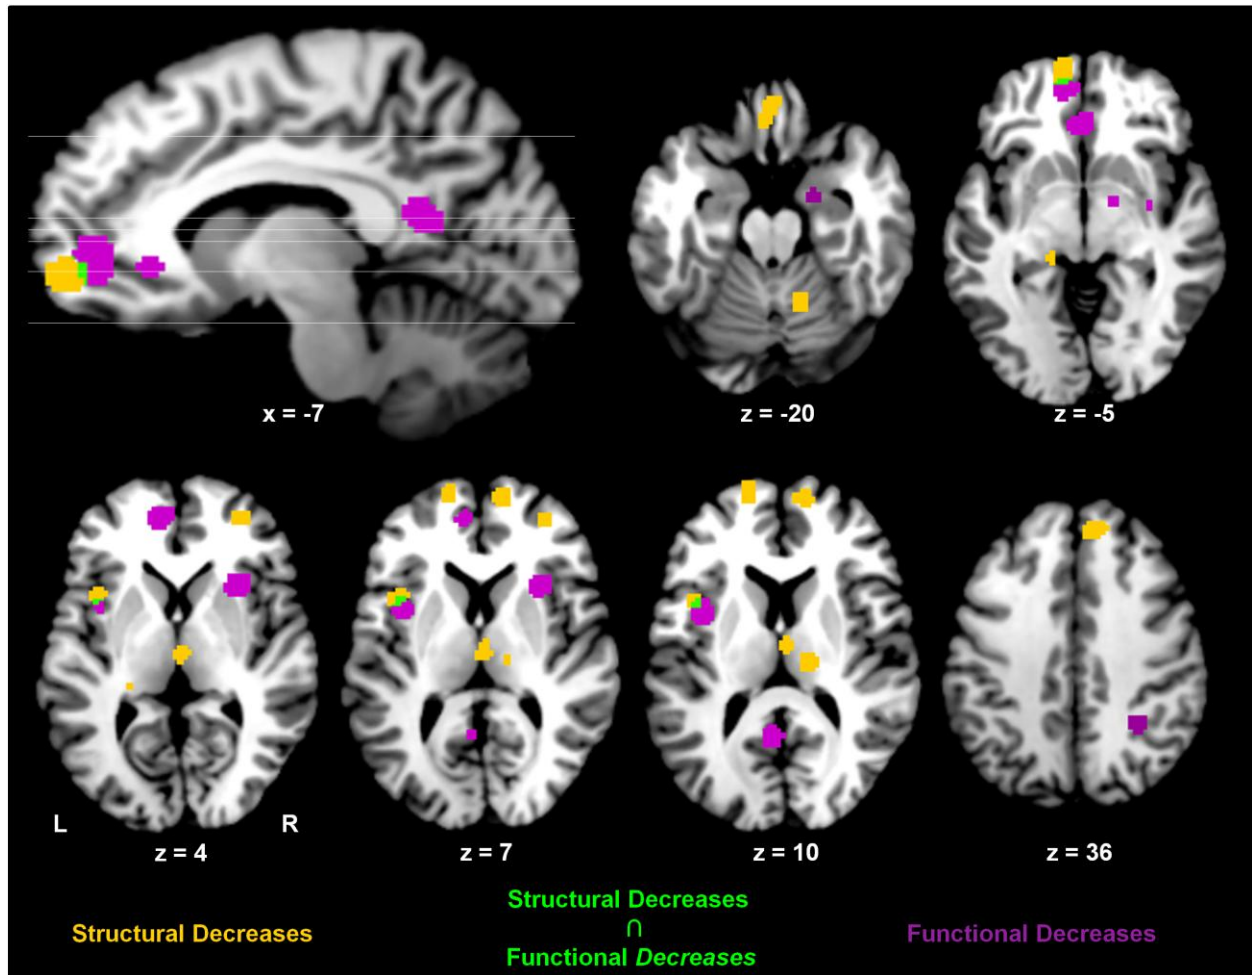

**Figure S2. Multimodal meta-analytic assessment: Visualization of overlapping and *non-overlapping* regions associated with smoking-related structural alterations and acute drug-induced functional activity decreases.** Gray matter decreases (**yellow**: nonsmokers > smokers; also shown in main text Figure 1 and Table 1) overlapped (**green**; also shown in main text Figure 2 and Table 2) with drug-induced functional activity decreases (**purple**; baseline > drug; reported in Sutherland *et al.*, 2015) in the left insula and vmPFC. See Sutherland *et al.*, (2015) for full characterization of convergent activity decreases associated with acute nAChR agonist administration.

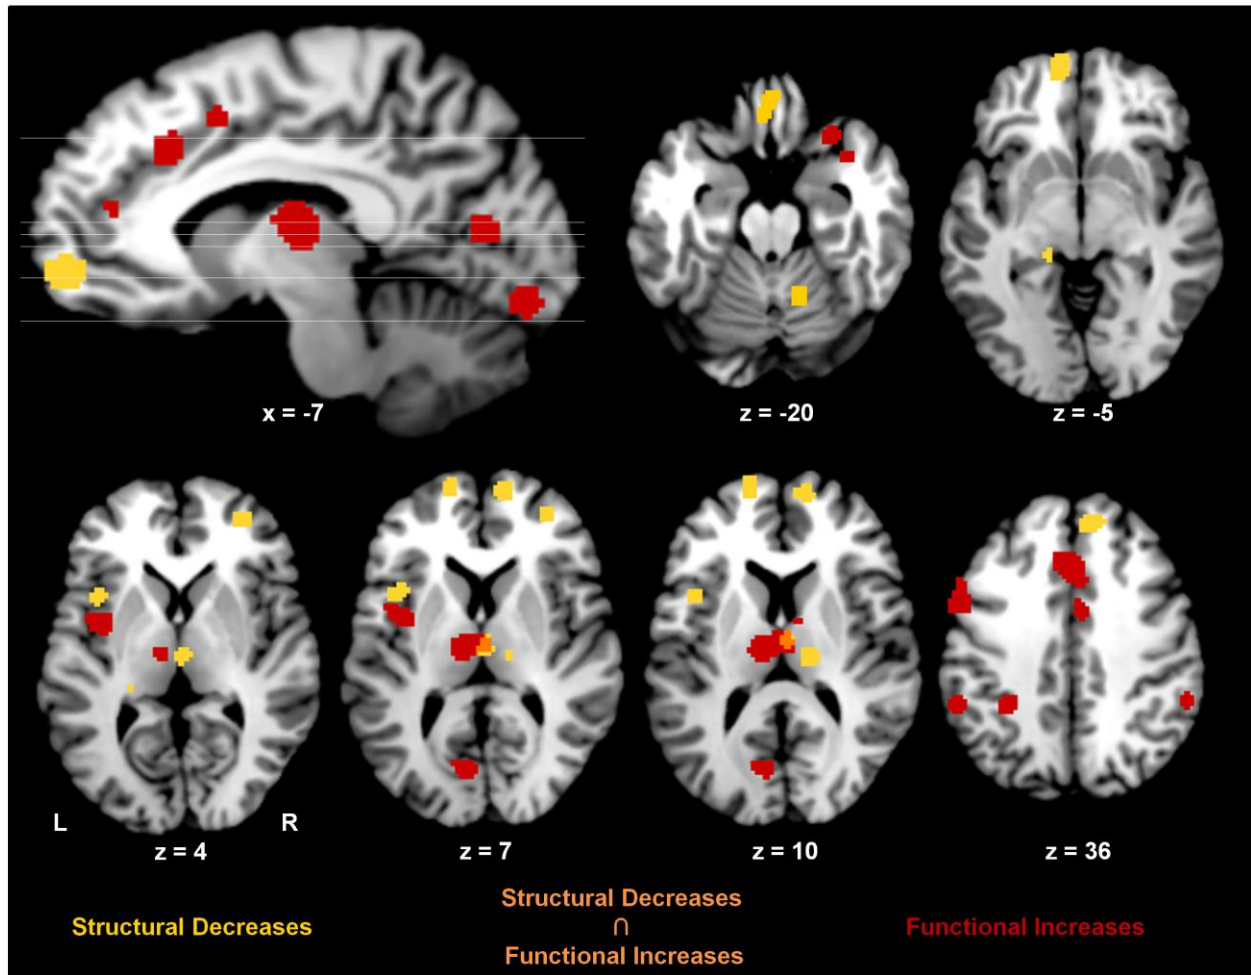

**Figure S3. Multimodal meta-analytic assessment: Visualization of overlapping and *non-overlapping* regions associated with smoking-related structural alterations and acute drug-induced functional activity *increases*.** Gray matter decreases (yellow: nonsmokers > smokers; also shown in main text Figure 1 and Table 1) overlapped (orange; also shown in main text Figure 2 and Table 2) with drug-induced functional activity increases (red; drug > baseline; reported in Sutherland *et al.*, [2015]) in the MD thalamus. See Sutherland *et al.*, (2015) for full characterization of convergent activity increases associated with acute nAChR agonist administration.

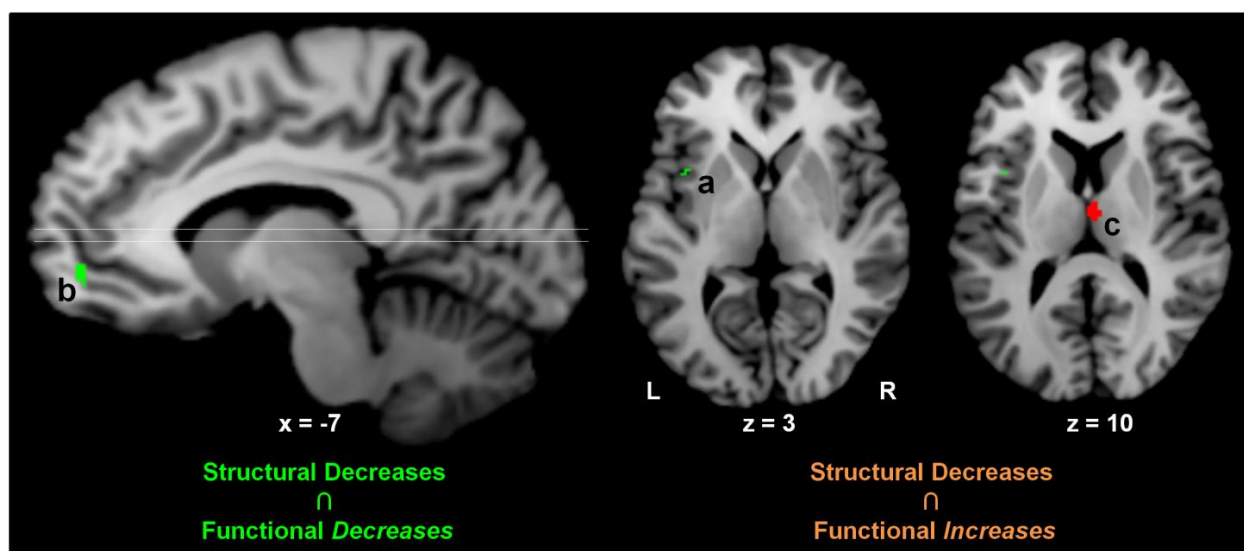

**Figure S4.** Conjoint structural and functional effects *when considering only functional studies involving nicotine administration*. We note that the previously published functional meta-analyses leveraged to identify structural/functional overlap in Figure 2 of the main text included studies involving multiple nAChR agonists (i.e., nicotine, varenicline and 3-(2,4-dimethoxybenzylidene)-anabaseine). For those functional meta-analyses, we identified 38 pharmacologic fMRI studies that assessed the acute effects of nAChR agonist administration (364 foci, from 77 contrasts; activity decreases: 28 studies, 179 foci, 39 contrasts; activity increases: 26 studies, 185 foci, 38 contrasts) and coded those studies according to nAChR manipulation method as involving either direct pharmacologic administration (26 studies: 263 foci, 51 contrasts) or cigarette smoking (12 studies: 101 foci, 28 contrasts). Pharmacologic administration methods employed were *nicotine delivery strategies* (transdermal patch [n=7 studies], nasal spray [n=7], buccal gum [n=5], subcutaneous injection [n=2], and buccal lozenge [n=1]), *oral varenicline* (n=3; an alpha4beta2 nAChR partial agonist/alpha7 full agonist), or *oral 3-(2,4-dimethoxybenzylidene)-anabaseine* (n=1; an alpha7 nAChR partial agonist). Thus, of the 38 pharmacological fMRI studies included in those functional meta-analyses, 4 involved nAChR agonists other than nicotine (functional activity increases: 21 foci, 5 contrasts; function activity decreases: 17 foci, 5 contrasts). The rationale for including a range of nicotine delivery methods as well as multiple nAChR agonist (which, although different drugs, are all of the same drug class as they have similar chemical structures and mechanisms of action/biological targets) in the meta-analysis, is to increase generalizability.

To determine if the inclusion of drugs other than nicotine exerted an undue influence on our previously reported outcomes, we performed an ancillary multimodal assessment involving only studies examining nicotine. The ancillary functional meta-analyses involving only studies characterizing nicotine administration, consisted of 24 studies (158 foci, 34 contrasts) reporting activity decreases and 22 studies (168 foci, 33 contrasts) reporting activity increases. Structural alterations (nonsmokers > smokers) overlapped with acute nicotine-induced activity decreases (baseline > drug) in the left insula (**green, a**: volume = 38mm<sup>3</sup>, X = -39, Y = 5, Z = 5) and vmPFC (**green, b**: volume = 103mm<sup>3</sup>, X = -13, Y = 51, Z = -1). Structural alterations (nonsmokers > smokers) overlapped with acute drug-induced activity increases (drug > baseline) in the mediodorsal thalamus (**orange, c**: volume = 291mm<sup>3</sup>, X = 3, Y = -9, Z = 13). These outcomes suggest that the inclusion of studies characterizing nAChR agonists other than nicotine did not exert an undue influence on the results presented in Figure 2 of the main text and our interpretations thereof.

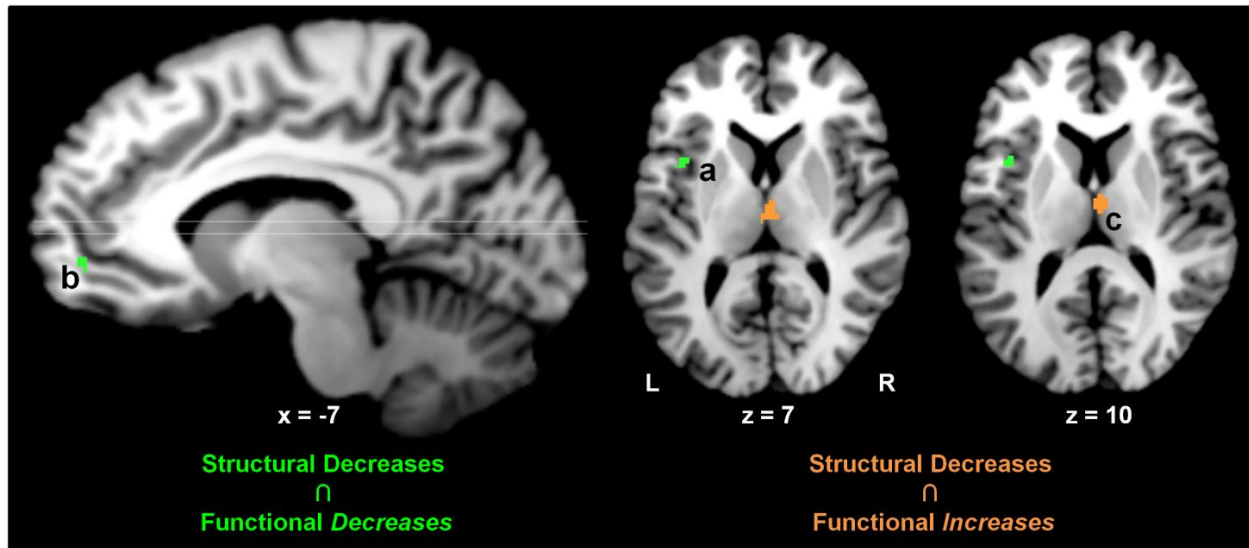

**Figure S5.** Conjoint structural and functional effects when considering only functional studies involving cigarette smokers. We note that the previously published functional meta-analyses leveraged to identify structural/functional overlap in Figure 2 of the main text included studies involving both smokers and nonsmokers. For those functional meta-analyses, we identified 38 pharmacologic fMRI studies that assessed the acute effects of nAChR agonist administration (364 foci, from 77 contrasts; activity decreases: 28 studies, 179 foci, 39 contrasts; activity increases: 26 studies, 185 foci, 38 contrasts) in studies involving both smokers (27 studies, 260 foci, 54 contrasts) and nonsmokers (11 studies, 102 foci, 22 contrasts).

To determine if the inclusion of studies involving nonsmokers exerted an undue influence on the outcomes reported in Figure 2 of the main text, we performed an ancillary multimodal assessment involving only functional studies of cigarette smokers. The ancillary functional meta-analyses involving only studies characterizing drug effects among smokers consisted of 20 studies (135 foci, 28 contrasts) reporting activity decreases and 19 studies (125 foci, 26 contrasts) reporting activity increases. Structural alterations (nonsmokers > smokers) overlapped with acute drug-induced activity decreases (baseline > drug) in the left insula (**green, a**: volume = 185mm<sup>3</sup>, X = -39, Y = 9, Z = 13) and vmPFC (**green, b**: volume = 45mm<sup>3</sup>, X = -11, Y = 51, Z = -1). Structural alterations (nonsmokers > smokers) overlapped with acute drug-induced activity increases (drug > baseline) in the mediodorsal thalamus (**orange, c**: volume = 337mm<sup>3</sup>, X = 3, Y = -9, Z = 13). These outcomes suggest that the inclusion of studies involving nonsmokers did not exert an undue influence on the results presented in Figure 2 of the main text and our interpretations thereof.

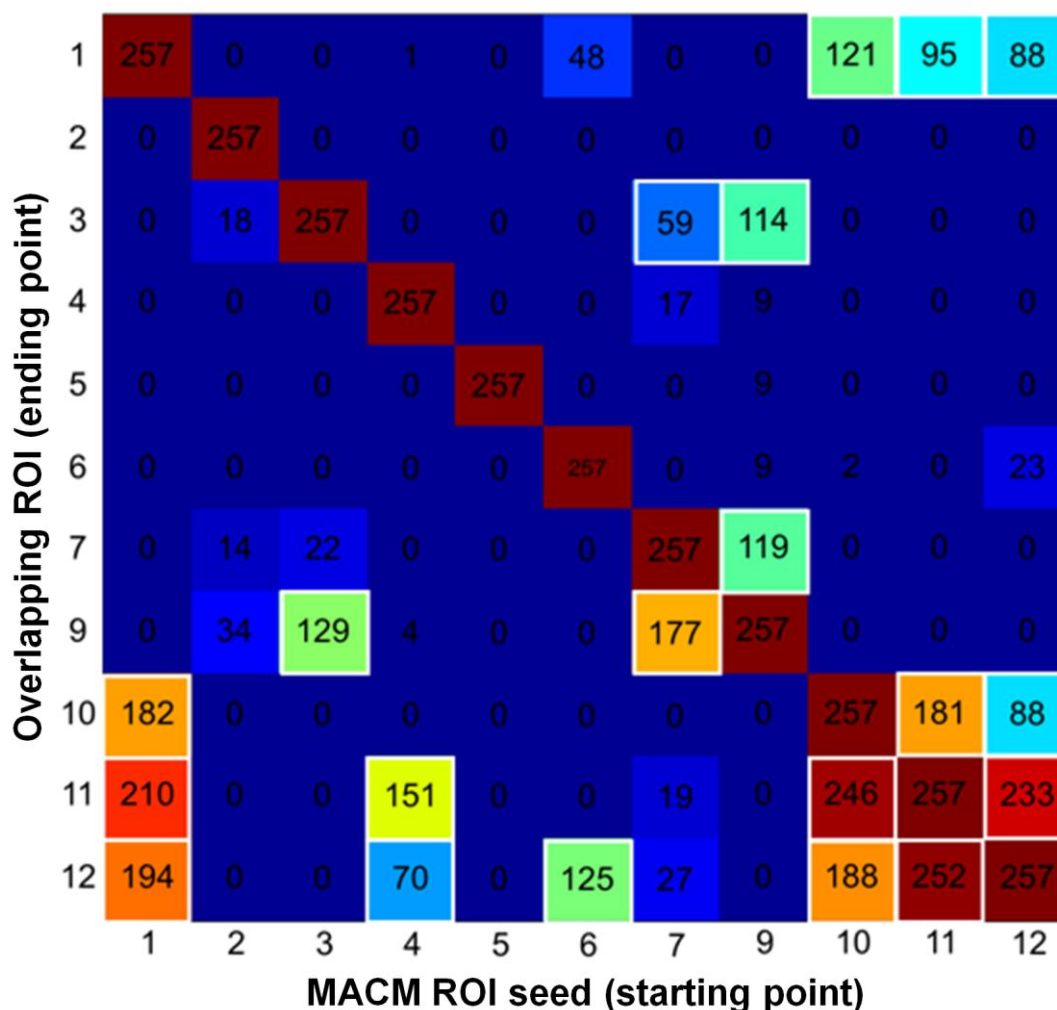

**Figure S6. Delineating functionally related ROIs.** We quantified the degree to which one ROIs MACM map (starting point) intersected with any of the other structurally-impacted ROIs (ending point). If one ROI's MACM map overlapped at least 50 voxels of any other ROI, those two regions were considered to be functionally related. The plot above depicts the numbers of overlapping voxels when considering each pair of ROIs. The *x-axis* designates the structurally-impacted ROI that was used as the seed region in a given MACM assessment and the *y-axis* represents the ROIs with which that map could overlap. Those ROIs considered functionally interrelated are boxed in white. For example, the MACM map for ROI 1 overlapped ROIs 10, 11, and 12. In total, there were 55 unique paths (one side of the diagonal). We note that if one ROI overlapped another ROI's MACM map, it did not necessarily indicate that the latter ROI would overlap the former's MACM map (i.e., a path from ROI 4 to ROI 12 does not indicate a path from ROI 12 to ROI 4). The values on the diagonal represent overlap with the seed itself. See main text Figure 4 for an alternative visualization.

**SUPPLEMENTAL REFERENCES**

- Almeida OP, Garrido GJ, Alfonso H, Hulse G, Lautenschlager NT, Hankey GJ, Flicker L (2011) 24-month effect of smoking cessation on cognitive function and brain structure in later life. *Neuroimage* 55:1480-1489.
- Almeida OP, Garrido GJ, Lautenschlager NT, Hulse GK, Jamrozik K, Flicker L (2008) Smoking is associated with reduced cortical regional gray matter density in brain regions associated with incipient Alzheimer disease. *The American journal of geriatric psychiatry : official journal of the American Association for Geriatric Psychiatry* 16:92-98.
- Brody AL, Mandelkern MA, Jarvik ME, Lee GS, Smith EC, Huang JC, Bota RG, Bartzokis G, London ED (2004) Differences between smokers and nonsmokers in regional gray matter volumes and densities. *Biol Psychiatry* 55:77-84.
- Chen X, Wen W, Anstey KJ, Sachdev PS (2006) Effects of cerebrovascular risk factors on gray matter volume in adults aged 60-64 years: a voxel-based morphometric study. *Psychiatry Res* 147:105-114.
- Franklin TR, Wetherill RR, Jagannathan K, Johnson B, Mumma J, Hager N, Rao H, Childress AR (2014) The effects of chronic cigarette smoking on gray matter volume: influence of sex. *PLoS One* 9:e104102.
- Fritz HC, Wittfeld K, Schmidt CO, Domin M, Grabe HJ, Hegenscheid K, Hosten N, Lotze M (2014) Current smoking and reduced gray matter volume-a voxel-based morphometry study. *Neuropsychopharmacology* 39:2594-2600.
- Gallinat J, Meisenzahl E, Jacobsen LK, Kalus P, Bierbrauer J, Kienast T, Witthaus H, Leopold K, Seifert F, Schubert F, Staedtgen M (2006) Smoking and structural brain deficits: a volumetric MR investigation. *The European journal of neuroscience* 24:1744-1750.
- Hanlon CA, Owens MM, Joseph JE, Zhu X, George MS, Brady KT, Hartwell KJ (2014) Lower subcortical gray matter volume in both younger smokers and established smokers relative to non-smokers. *Addict Biol*.
- Kuhn S, Schubert F, Gallinat J (2010) Reduced Thickness of Medial Orbitofrontal Cortex in Smokers. *Biological Psychiatry* 68:1061-1065.
- Liao Y, Tang J, Liu T, Chen X, Hao W (2012) Differences between smokers and non-smokers in regional gray matter volumes: a voxel-based morphometry study. *Addict Biol* 17:977-980.
- Morales AM, Lee B, Hellemann G, O'Neill J, London ED (2012) Gray-matter volume in methamphetamine dependence: cigarette smoking and changes with abstinence from methamphetamine. *Drug Alcohol Depend* 125:230-238.
- Riedel MC, Ray KL, Dick AS, Sutherland MT, Hernandez Z, Fox PM, Eickhoff SB, Fox PT, Laird AR (2015) Meta-analytic connectivity and behavioral parcellation of the human cerebellum. *Neuroimage* 117:327-342.

- Stoeckel LE, Chai XJ, Zhang J, Whitfield-Gabrieli S, Evins AE (2015) Lower gray matter density and functional connectivity in the anterior insula in smokers compared with never smokers. *Addict Biol.*
- Sutherland MT, Ray KL, Riedel MC, Yanes JA, Stein EA, Laird AR (2015) Neurobiological impact of nicotinic acetylcholine receptor agonists: an activation likelihood estimation meta-analysis of pharmacologic neuroimaging studies. *Biol Psychiatry* 78:711-720.
- Wang K, Yang J, Zhang S, Wei D, Hao X, Tu S, Qiu J (2014) The neural mechanisms underlying the acute effect of cigarette smoking on chronic smokers. *PLoS One* 9:e102828.
- Weiskopf N, Hutton C, Josephs O, Turner R, Deichmann R (2007) Optimized EPI for fMRI studies of the orbitofrontal cortex: compensation of susceptibility-induced gradients in the readout direction. *Magma* 20:39-49.
- Yu R, Zhao L, Lu L (2011) Regional gray and white matter changes in heavy male smokers. *PLoS One* 6:e27440.
- Zhang X, Salmeron BJ, Ross TJ, Geng X, Yang Y, Stein EA (2011) Factors underlying prefrontal and insula structural alterations in smokers. *Neuroimage* 54:42-48.
